# Supplementary material for: Reviews and Syntheses: Carbon biogeochemistry of Indian estuaries
Source: Copernicus journal article supplement (doi:10.5194/bg-2022-200), 2022-10-14
Supplement: Supplementary file 1 [file bg-2022-200-supplement.pdf]

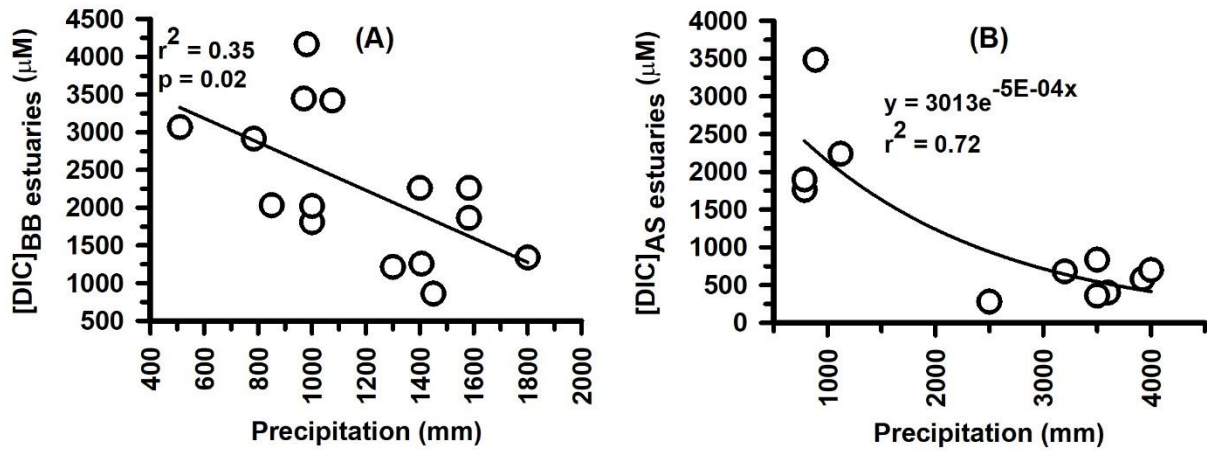

1  
2  
3  
4  
5

Fig.S1: The DIC – precipitation relationship in the (A) BB estuaries, and (B) AS estuaries during the wet season.

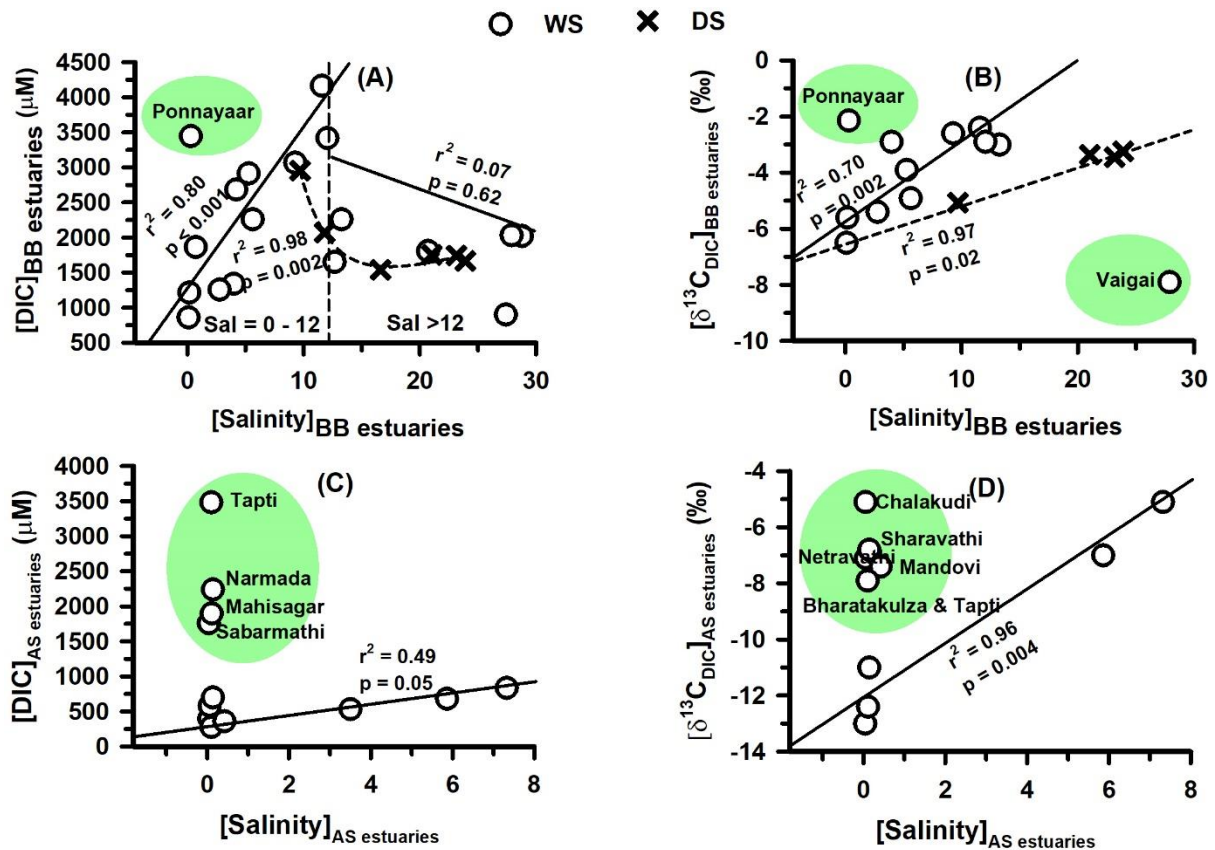

6  
7  
8  
9  
10

Fig. S2: (A) DIC – salinity in the BB estuaries, (B)  $\delta^{13}\text{C}_{\text{DIC}}$  – salinity in the BB estuaries, (C) DIC – salinity in the AS estuaries, (B)  $\delta^{13}\text{C}_{\text{DIC}}$  – salinity in the AS estuaries. The marked estuaries were excluded for the data analysis. WS = wet season; DS = dry season.

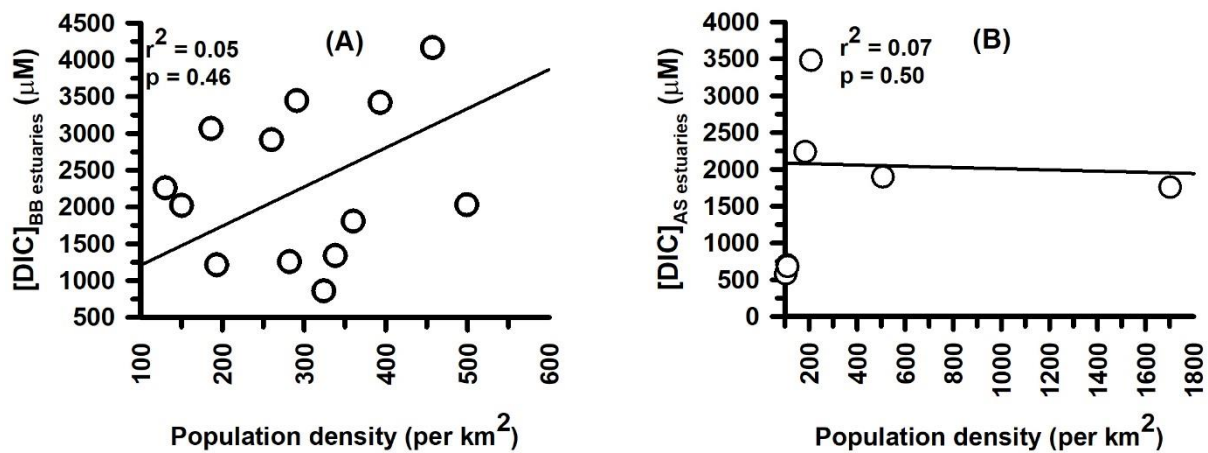

11

12 Fig. S3: The DIC – population density relationship for the (A) BB estuaries, (B) AS estuaries  
 13 during the wet season.

14

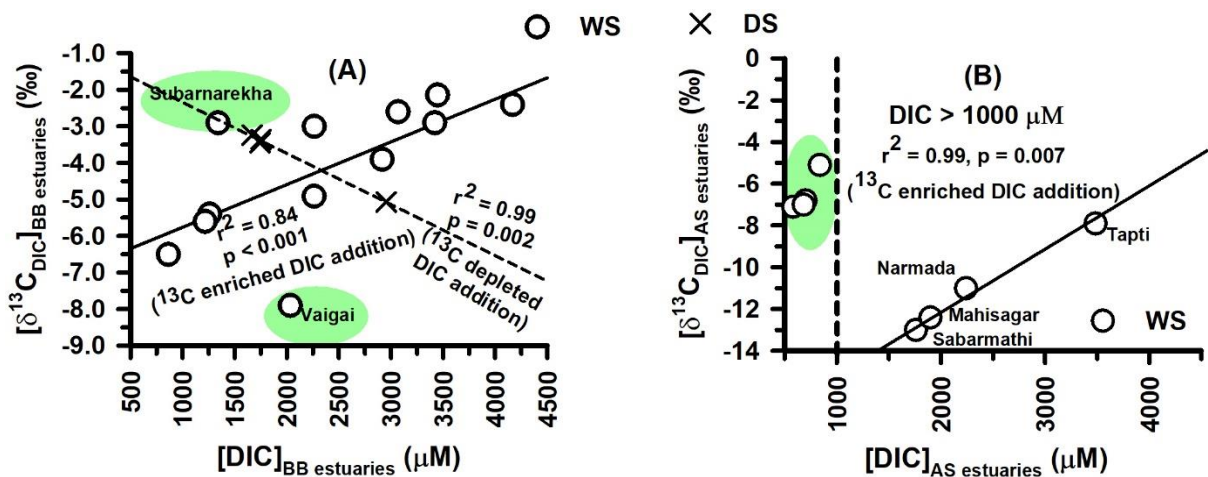

15

16 Fig. S4: The  $\delta^{13}C_{DIC}$  – DIC in the (A) BB estuaries (B) AS estuaries. The marked estuaries  
 17 were excluded for the data analysis. WS = wet season; DS = dry season.

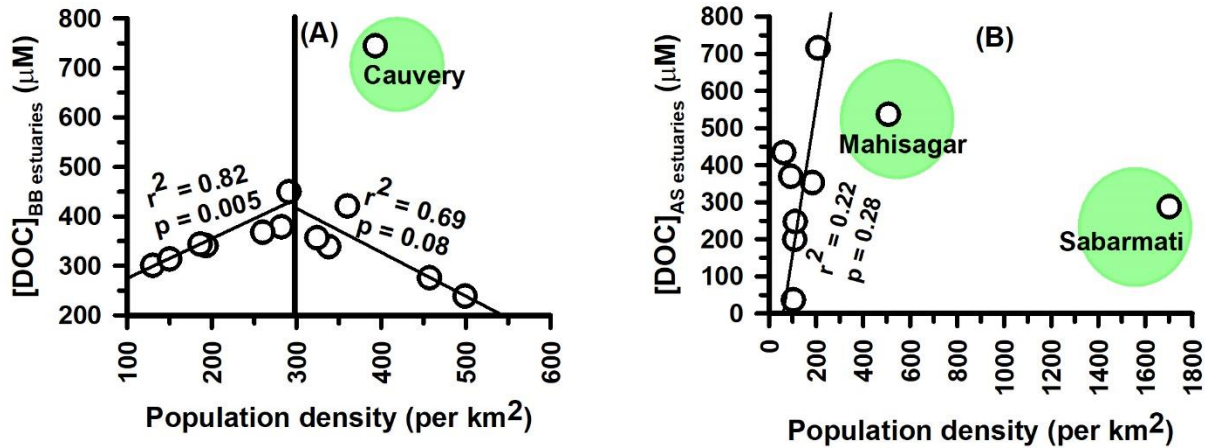

18

19 Fig.S5: The DOC – population density relationship in the (A) BB estuaries, (B) AS estuaries  
 20 during the wet season. The marked estuaries were excluded for the data analysis.

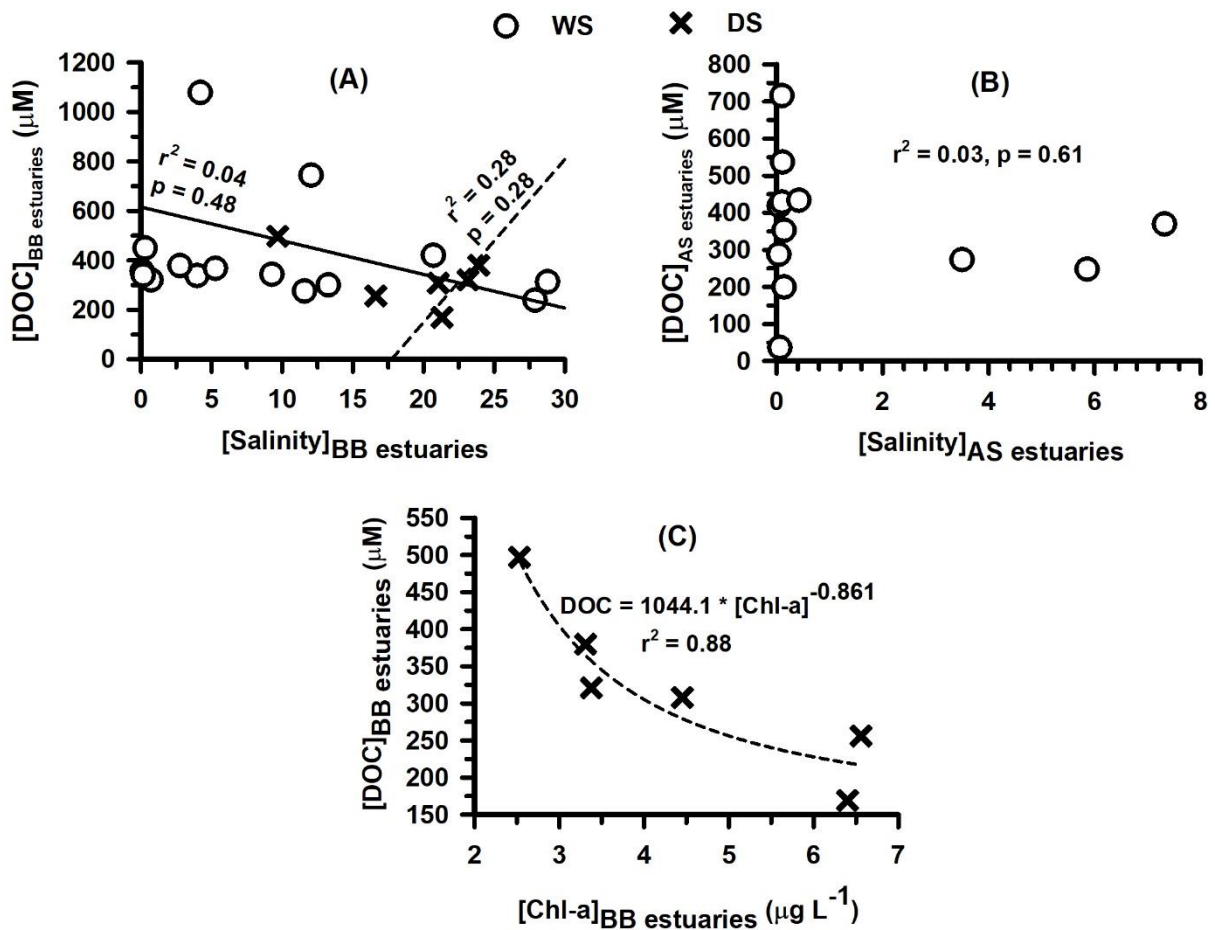

21

22 Fig.S6: (A) DOC – salinity relationship in BB estuaries, (B) DOC – salinity relationship in AS  
 23 estuaries, (C) DOC – Chl – a relationship in the BB estuaries during the dry season. WS = wet  
 24 season; DS = dry season.

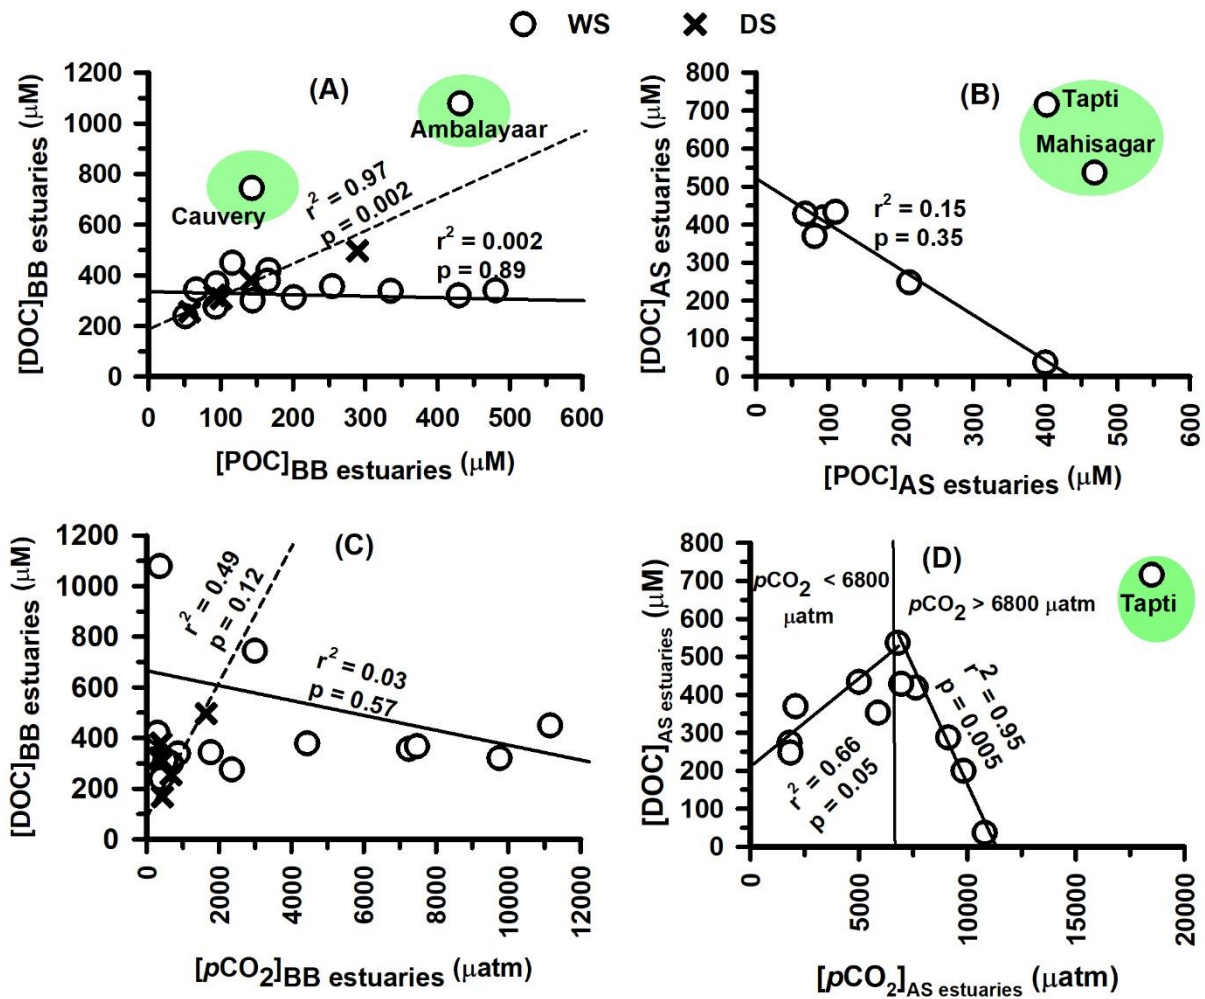

25

26 Fig.S7: (A) DOC – POC relationship in the BB estuaries, (C) DOC – POC relationship in the  
 27 AS estuaries, (D) DOC –  $p\text{CO}_2$  relationship in the BB estuaries, and (E) DOC –  $p\text{CO}_2$   
 28 relationship in the AS estuaries. The marked estuaries were excluded for the data analysis. WS  
 29 = wet season; DS = dry season.

30



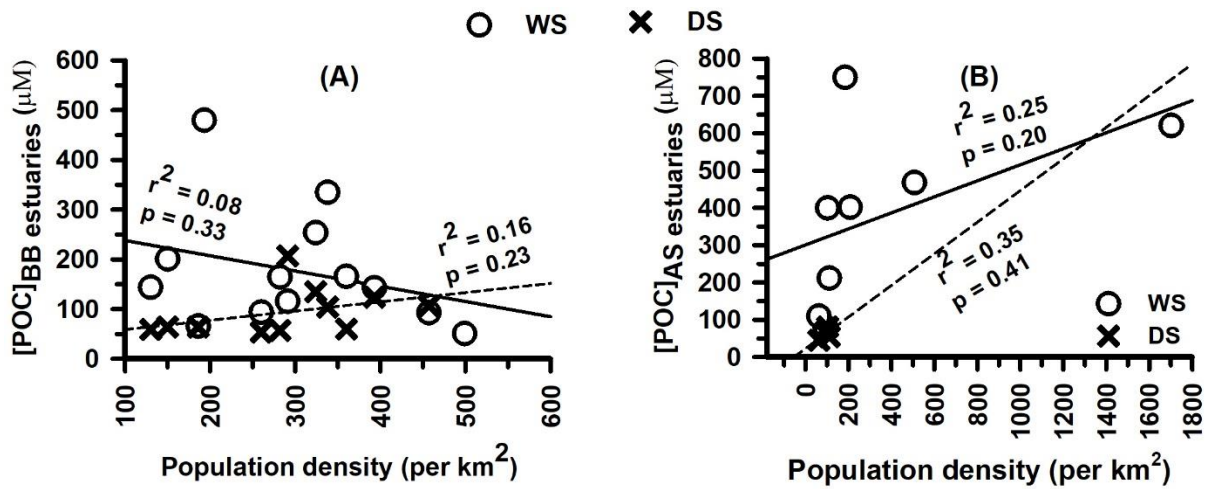

31

32 Fig. S8: The POC – population relationship in the (A) BB, (B) AS estuaries. WS = wet season;

33 DS = dry season.

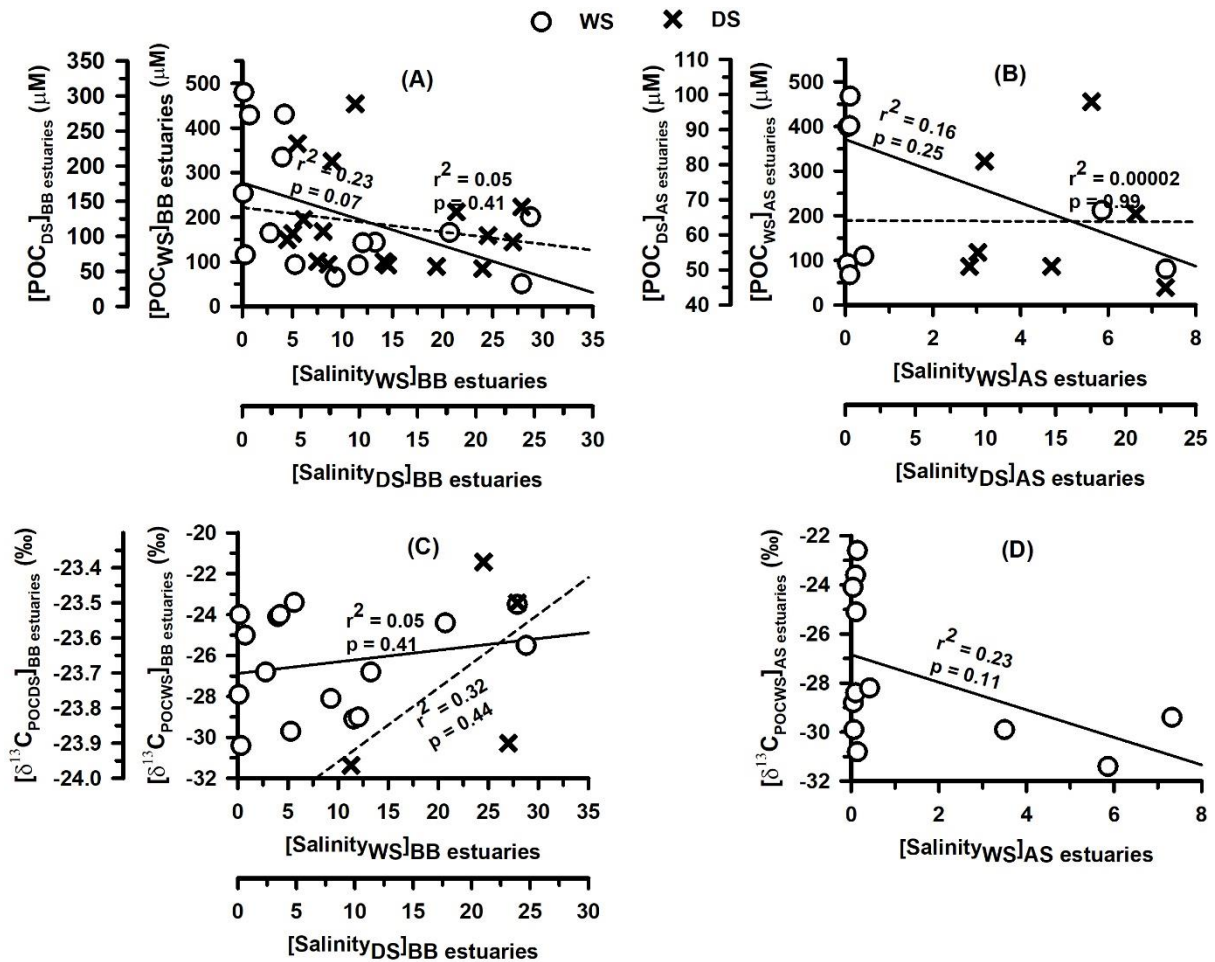

34

35 Fig. S9: (A) POC – salinity in the BB estuaries, (B) POC – salinity in the AS estuaries, (C)

36  $\delta^{13}\text{C}_{\text{POC}}$  – salinity in the BB estuaries, (D)  $\delta^{13}\text{C}_{\text{POC}}$  – salinity in the AS estuaries. WS = wet

37 season; DS = dry season.

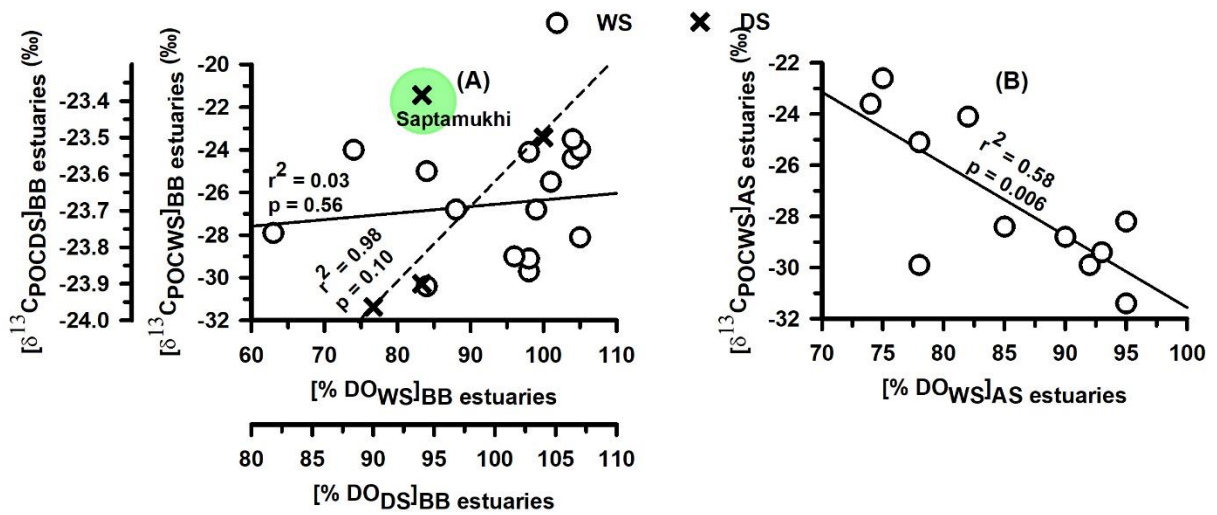

38

39 Fig.S10:  $\delta^{13}\text{C}_{\text{POC}}$  – %DO relationships in the (A) BB, and (B) AS estuaries. The marked  
40 estuaries were excluded for the data analysis. WS = wet season; DS = dry season.

41

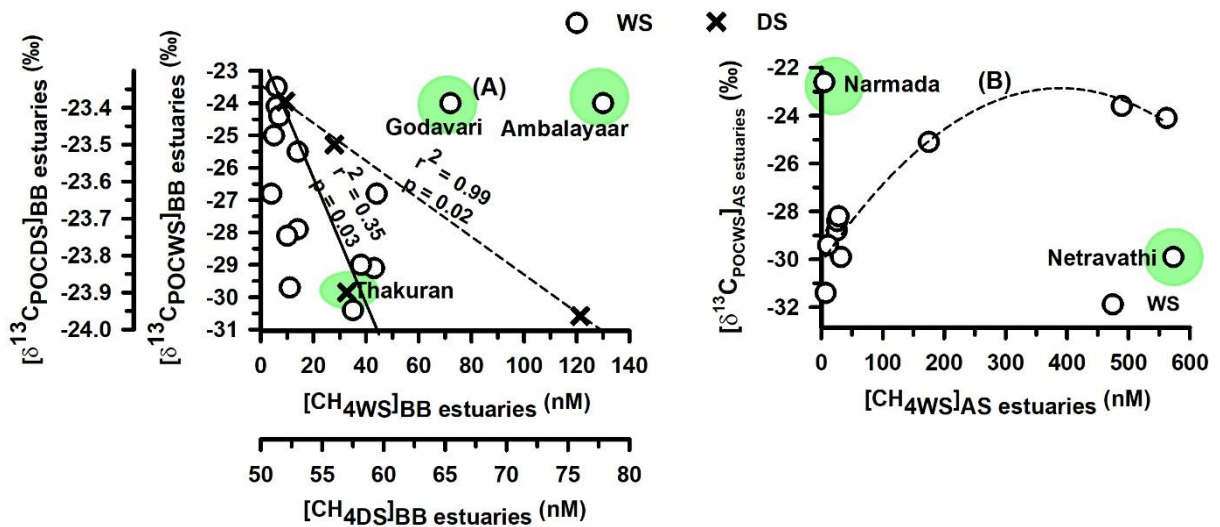

42

43 Fig.S11:  $\delta^{13}\text{C}_{\text{POC}}$  –  $\text{CH}_4$  relationships in the (A) BB, and (B) AS estuaries. The marked estuaries  
44 were excluded for the data analysis. WS = wet season; DS = dry season.

45

46

47

48

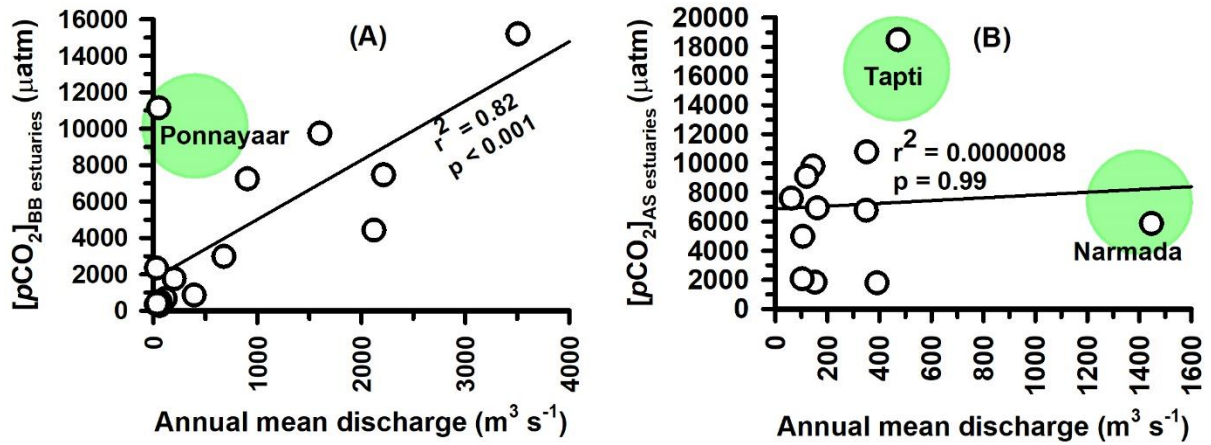

49

50 Fig.S12: The  $p\text{CO}_2$  – discharge relationship in the (A) BB, and (B) AS estuaries during the wet  
 51 season. The marked estuaries were excluded for the data analysis.

52

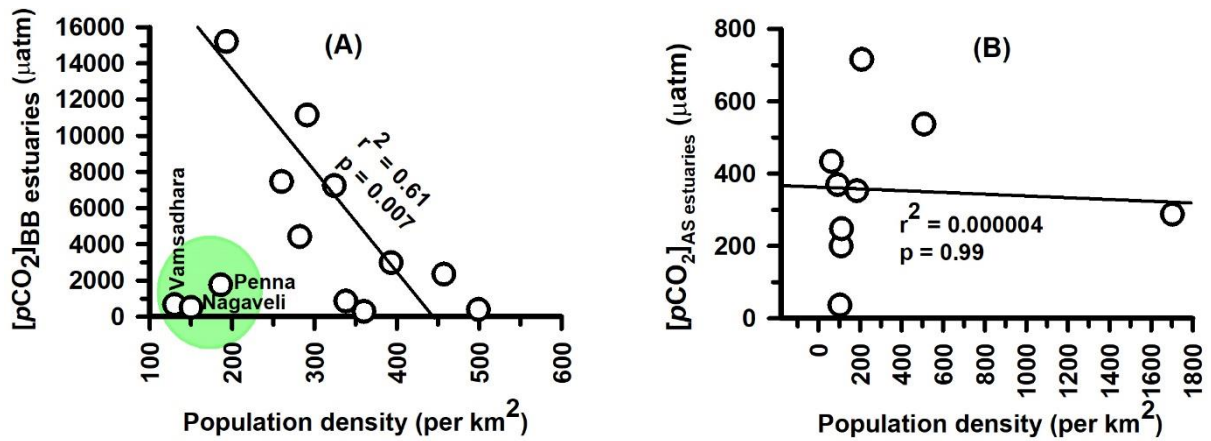

53

54 Fig.S13: The  $p\text{CO}_2$  – population density relationship in the (A) BB, and (B) AS estuaries during  
 55 the wet season. The marked estuaries were excluded for the data analysis.

56

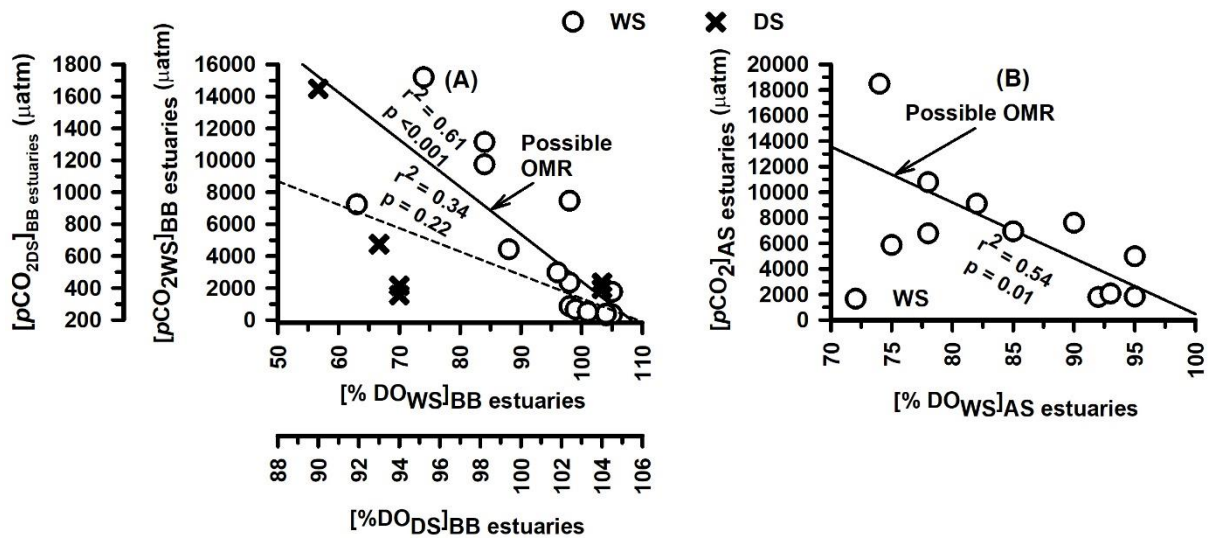

57

58 Fig.S14: The  $p\text{CO}_2$  - %DO relationship for the (A) BB, and (B) AS estuaries. WS = wet season;  
 59 DS = dry season; OMR = organic matter respiration

60

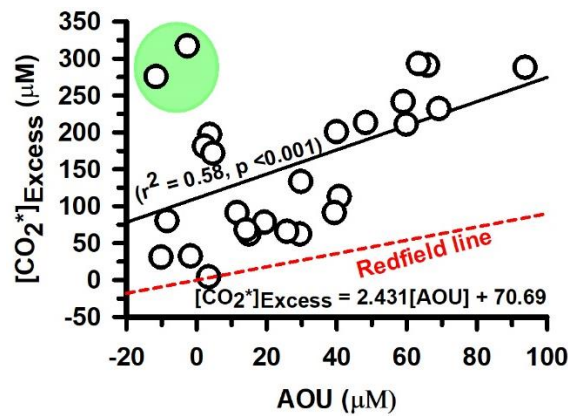

61

62 Fig.S15: The  $[\text{CO}_2^*]_{\text{Excess}}$  – AOU relationship for the Indian major rivers during the wet season.  
 63 The marked estuaries were excluded for the data analysis.



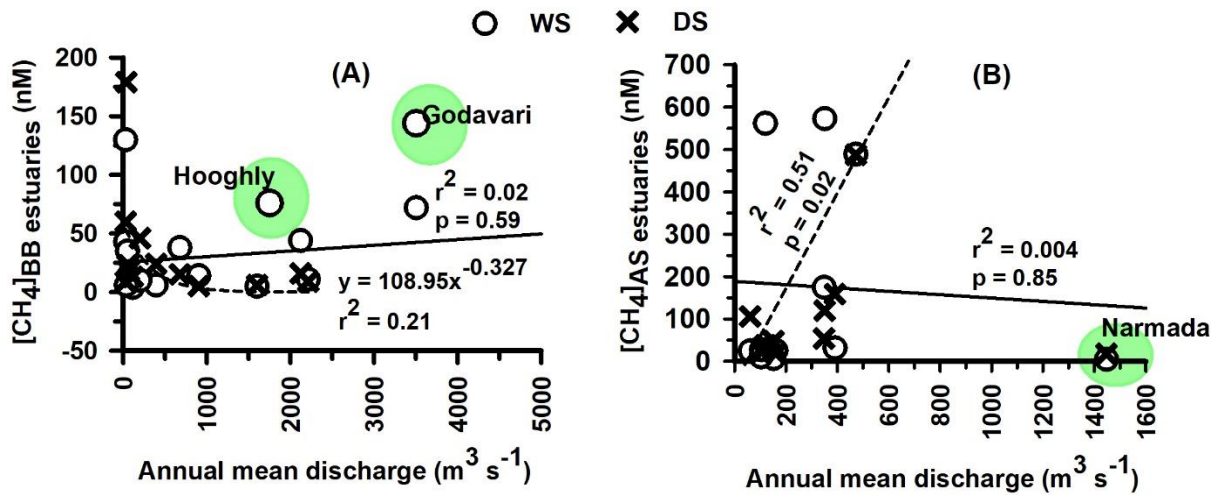

64

65 Fig.S16: The CH<sub>4</sub> – discharge relationships in the (A) BB, and (B) AS estuaries. The marked  
 66 estuaries were excluded for the data analysis. WS = wet season; DS = dry season.

67

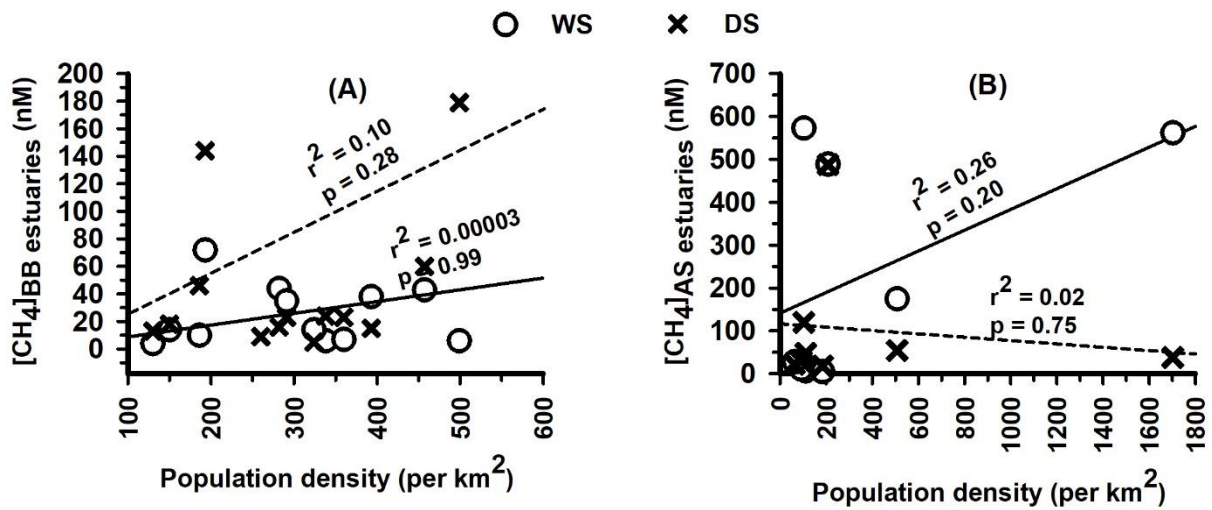

68

69 Fig.S17: The CH<sub>4</sub> – population density relationships in the (A) BB, and (B) AS estuaries. WS  
 70 = wet season; DS = dry season.

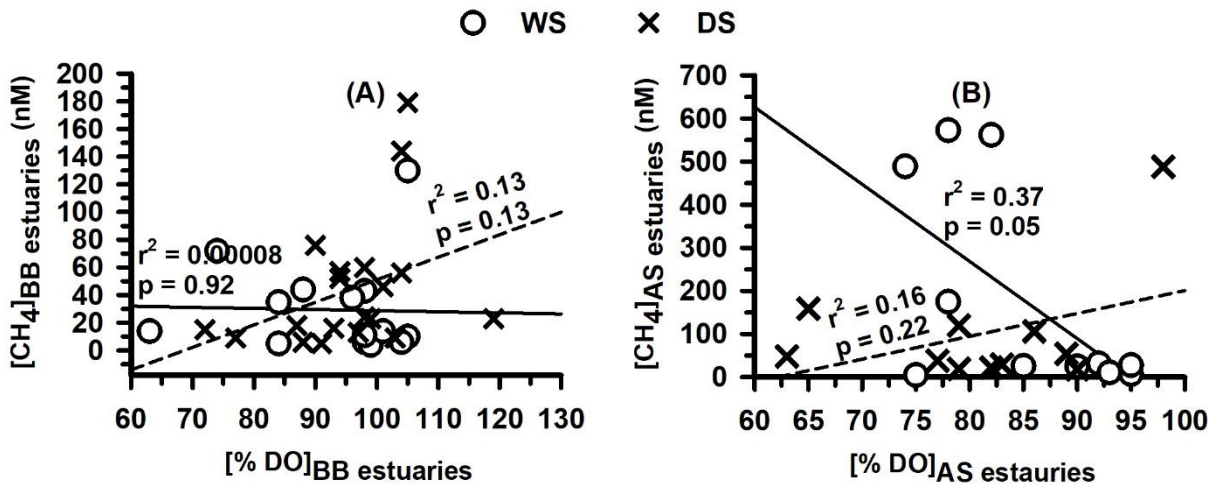

71

72 Fig.S18: The CH<sub>4</sub> – %DO relationships in the (A) BB, and (B) AS estuaries. WS = wet season;

73 DS = dry season.

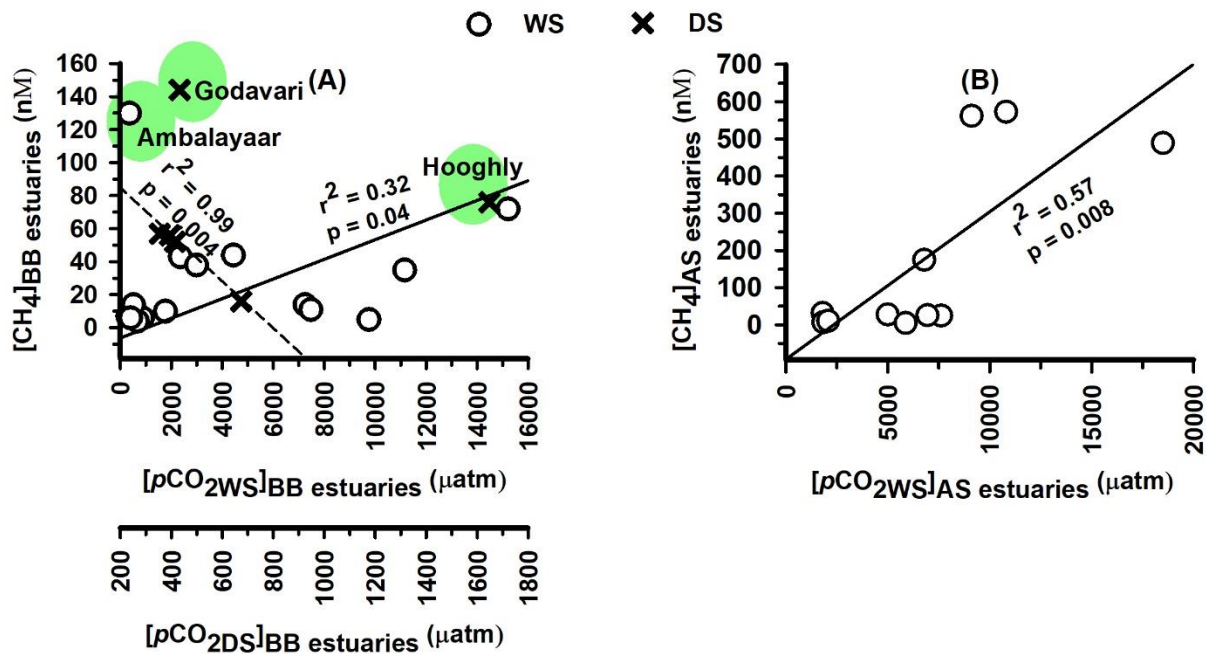

74

75 Fig. S19: The pCO<sub>2</sub> – CH<sub>4</sub> relationship in the (A) BB, and (B) AS estuaries. The marked

76 estuaries were excluded for the data analysis. WS = wet season; DS = dry season.

77

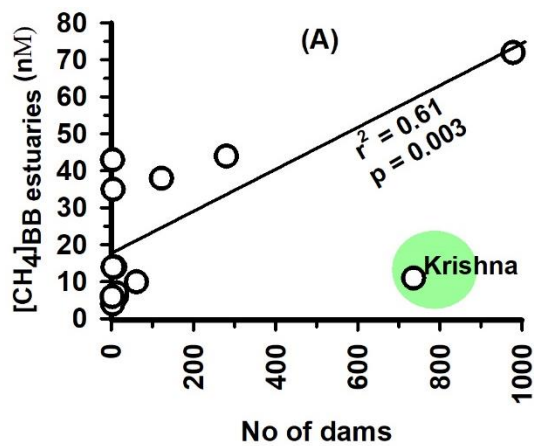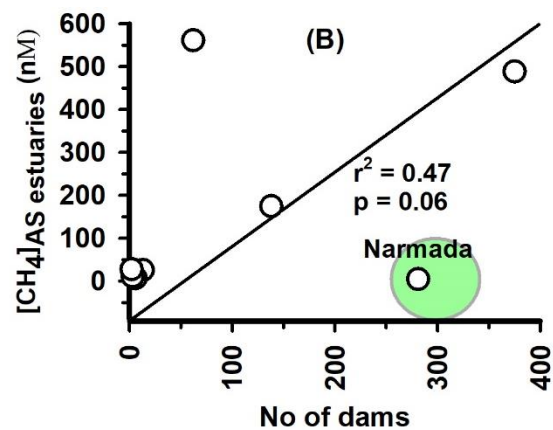

78

79 Fig. S20: The CH<sub>4</sub> – No of dams' relationship in the (A) BB, and (B) AS estuaries during the  
80 wet season. The marked estuaries were excluded for the data analysis.

81

82

83

84

85

86

87

88

89

90

91

92
